# Supplementary material for: Immunity from NK Cell Subsets Is Important for Vaccine-Mediated Protection in HPV+ Cancers
Source: MDPI journal article supplement (doi:10.3390/vaccines12020206), 2024-02-17
Supplement: s1 [file s1]

# **Supplemental Figures**

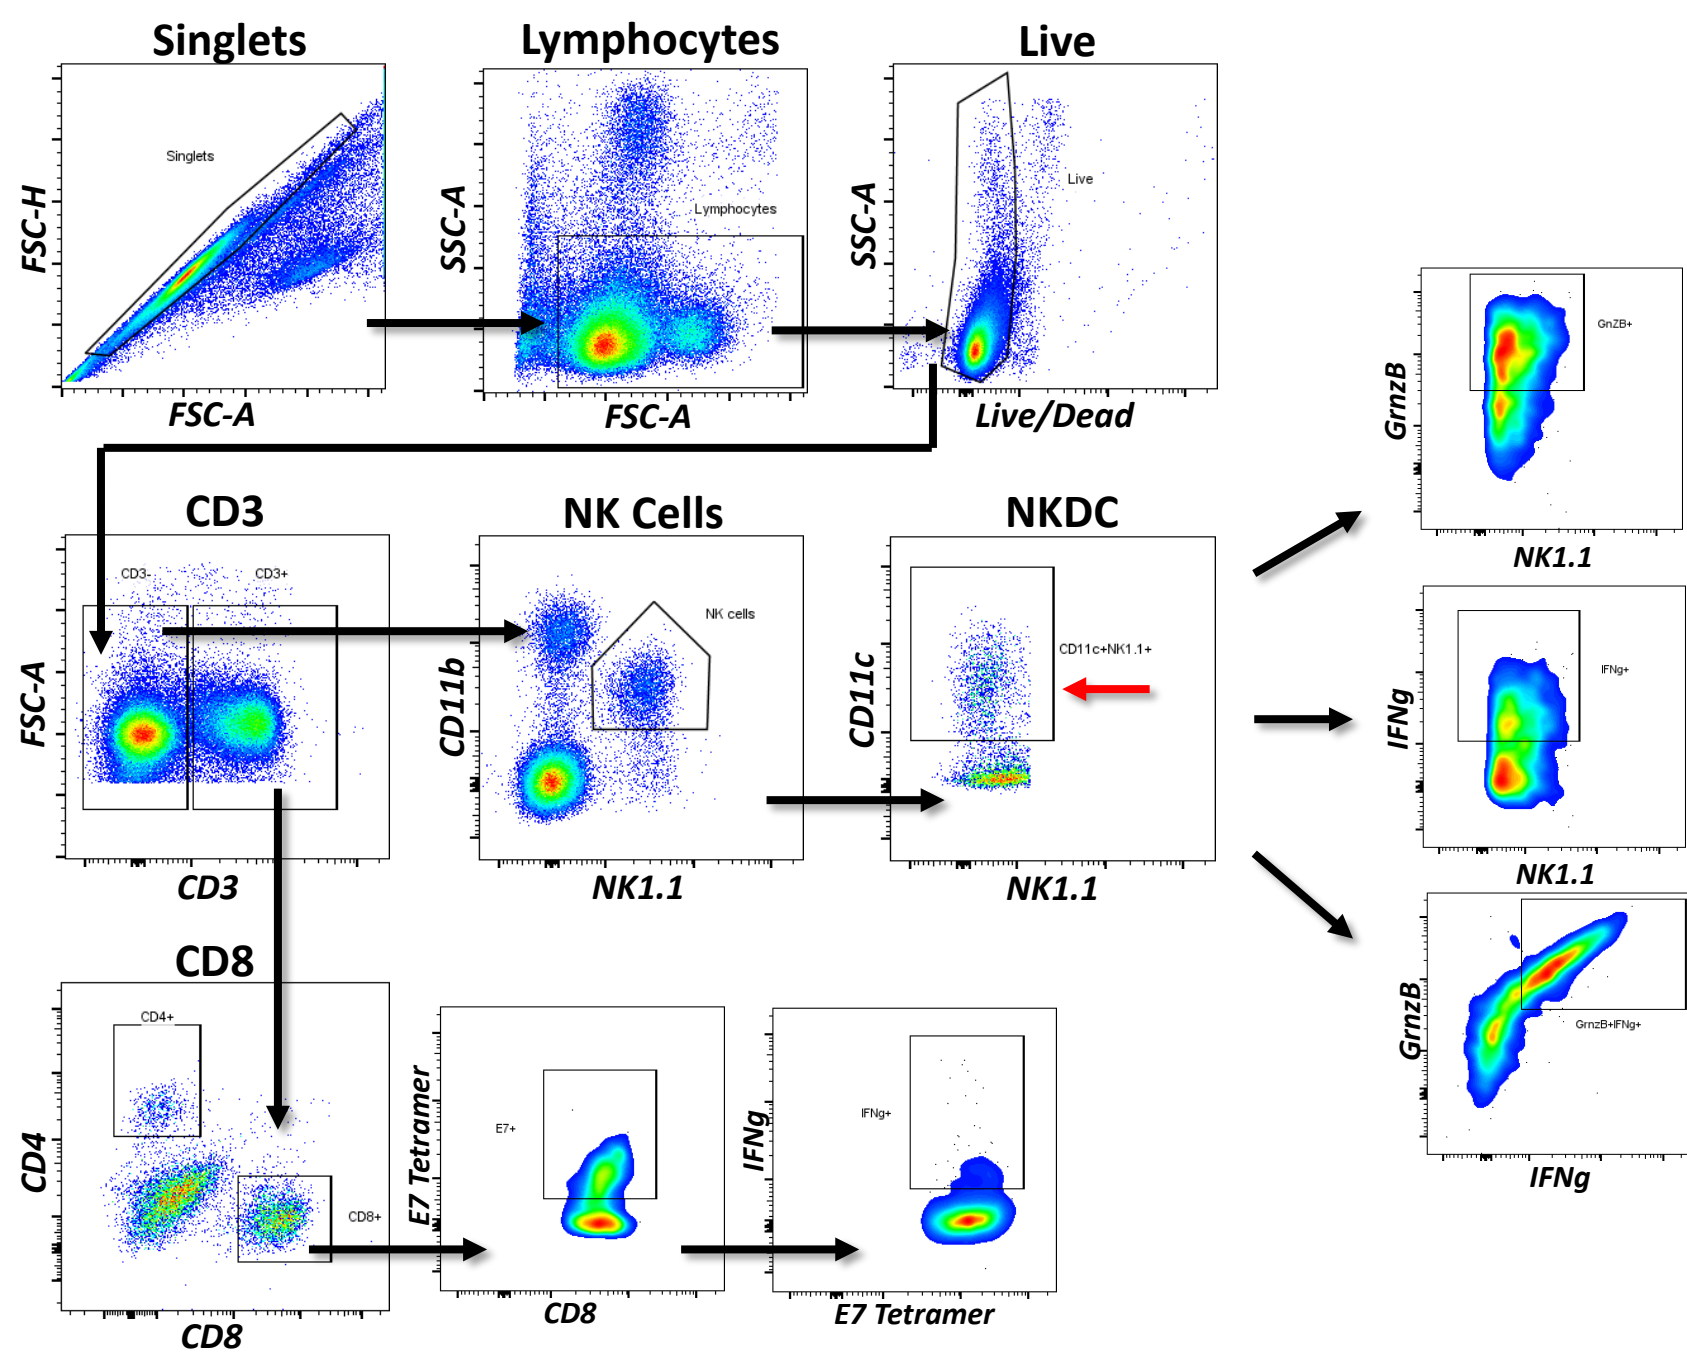

Supplemental Figure S1. Flow cytometry gating strategy for NKDC in mice.

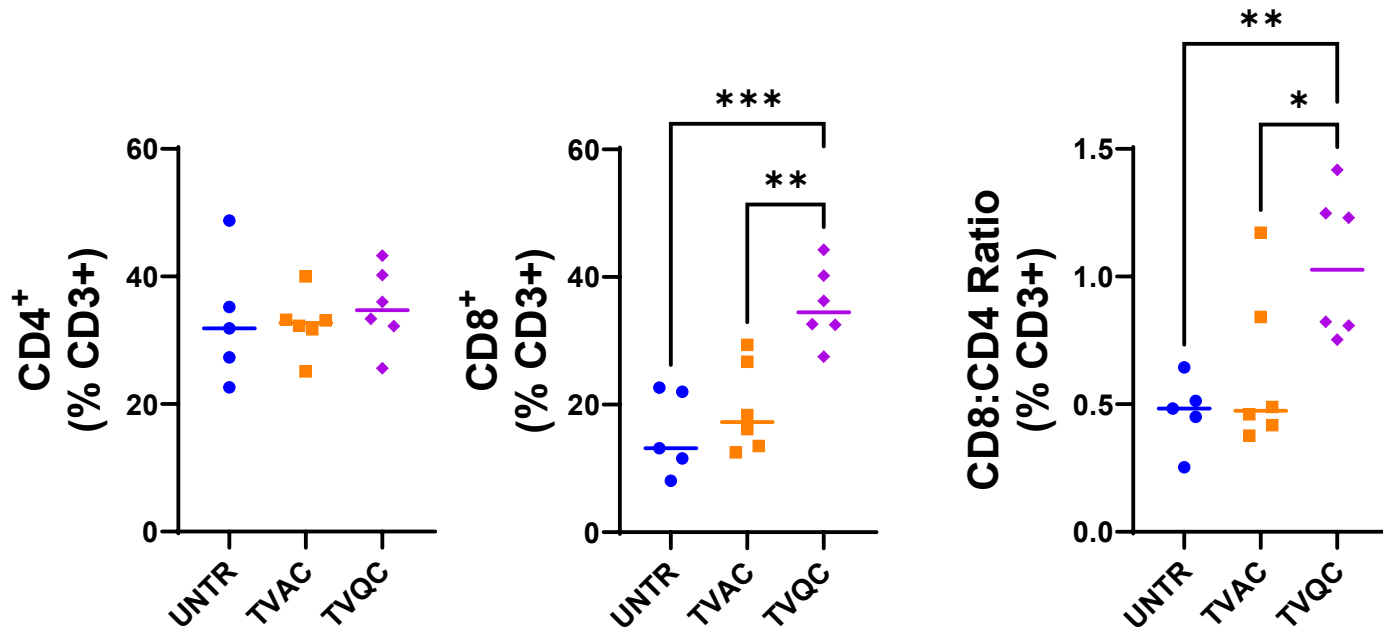

**Supplemental Figure S2. Total CD4 and CD8 T cells.** The frequencies of total CD4 and CD8 T cells, along with CD8:CD4 ratio, from TIL isolated from mEER oral tumors. Significance determined using Ordinary one-way ANOVA \* $p < 0.05$ , \*\* $p < 0.005$  \*\*\* $p < 0.0005$  ( $n = 5-6$  mice per group).

**Supplemental Table S1.** Antibodies for Flow Cytometry.

| Antibody       | Fluorophore  | Supplier          | Catalog #  |
|----------------|--------------|-------------------|------------|
| CD3            | BUV737       | BD Bioscience     | 612803     |
| CD11b          | BV786        | BD Bioscience     | 740861     |
| NK1.1          | PerCP-Cy5.5  | BD Bioscience     | 551114     |
| CTLA-4         | APC-R700     | BD Bioscience     | 565778     |
| CD8            | BUV395       | BD Bioscience     | 563786     |
| Granzyme B     | BV421        | Biolegend         | 396414     |
| CD4            | BV605        | Biolegend         | 100548     |
| CD45           | BV650        | Biolegend         | 103241     |
| IFNg           | BV711        | Biolegend         | 505835     |
| Foxp3          | AF488        | Biolegend         | 126406     |
| CD11c          | PE-Dazzle594 | Biolegend         | 117348     |
| PD-1           | PE-Cy7       | Biolegend         | 109110     |
| Gr-1           | APC-Fire750  | Biolegend         | 108424     |
| Arginase-1     | PE           | Life Technologies | 12-3697-82 |
| Live/Dead Aqua | BV510        | Life Technologies | L34965     |
| E7 Tetramer    | APC          | NIH               | N/A        |
| Fc Block       | N/A          | BD Bioscience     | 553142     |
